# Supplementary material for: Quantification and gene expression of Lactobacillus casei group species associated with dentinal lesions in early childhood caries
Source: PubMed Central journal article supplement — Saudi Dent J. 2020 Jan 30;33(2):69–77. doi: 10.1016/j.sdentj.2020.01.006 (PMC7848803; doi:10.1016/j.sdentj.2020.01.006), 2020-01-30
Supplement: mmc1.pdf [file mmc1.pdf]

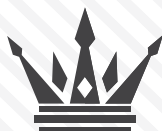

# EDITORIAL

## CERTIFICATE

**Authors:**

**REIS, A.C.M.; BEZERRA ,  
D.S.; HARTH-CHÚ, E.;  
STIPP, R.N.; GUEDES,  
S.F.F.; NEVES, B.G.;  
RODRIGUES, L.K.A.**

**Document title:**

**Quantification and gene expression of  
Lactobacillus casei group species  
associated with dentinal lesions in  
early childhood caries**

**Date Issued:**

**2019-12-24**

**Cambridge Proofreading LLC**

This document certifies that the above manuscript was proofread and edited by Cambridge Proofreading LLC.

This document certifies that the above manuscript was proofread and edited by Cambridge Proofreading Worldwide LLC. The document was edited for proper English language, grammar, punctuation, spelling, and overall style by one or more of our academic editors. The editor endeavoured to ensure that the author's intended meaning was not altered during the review. All amendments were tracked with the Microsoft Word 'Track Changes' feature. Therefore, the authors had the option to reject or accept each change individually.

Kind regards,  
Cambridge Proofreading

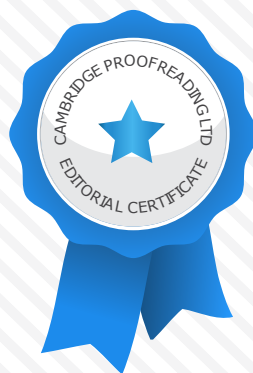

Cambridge Proofreading Worldwide LLC is a registered company headquartered in Chicago, Illinois, USA with a global presence. All of our editors are native speakers from USA and the UK. Our Certificate of Good Standing can be found in the Illinois state business database by searching our name here.
